# Supplementary material for: Evaluation of Element Mobility in River Sediment Using Different Single Extraction Procedures and Assessment of Probabilistic Ecological Risk
Source: MDPI journal article supplement (doi:10.3390/w13101411), 2021-05-18
Supplement: s1 [file s1]

# Evaluation of Element Mobility in River Sediment Using Different Single Extraction Procedures and Assessment of Probabilistic Ecological Risk

Sanja Sakan <sup>1,\*</sup>, Stanislav Frančišković-Bilinski <sup>2,\*</sup>, Dragana Đorđević <sup>1</sup>, Aleksandar Popović <sup>3</sup>, Nenad Sakan <sup>4</sup>, Sandra Škrivanj <sup>3</sup> and Halka Bilinski <sup>2</sup>

<sup>1</sup> Centre of Excellence in Environmental Chemistry and Engineering–ICTM, University of Belgrade, Njegoševa 12, 11158 Belgrade, Serbia; dragadj@chem.bg.ac.rs

<sup>2</sup> Ruđer Bošković Institute, Division for Marine and Environmental Research, 10000 Zagreb, Croatia; bilinski@irb.hr

<sup>3</sup> Faculty of Chemistry, University of Belgrade, Studentski trg 12–16, 11000 Belgrade, Serbia; apopovic@chem.bg.ac.rs (A.P.); sandra\_skrivanj@chem.bg.ac.rs (S.Š.)

<sup>4</sup> Institute of Physics, University of Belgrade, Pregrevica 118, 11080 Zemun, Serbia; nsakan@ipb.ac.rs

\* Correspondence: ssakan@chem.bg.ac.rs (S.S.); francis@irb.hr (S.F.-B.)

**Table S1.** Relationship between the contents of elements extracted with CaCl<sub>2</sub> and HNO<sub>3</sub> (%).

|                          | Al   | As   | Ba    | Be   | Cd   | Co   | Cr   | Cu   | Fe   | K    | Li   | Mg   | Mn   | Na   | Ni   | P    | Pb   | S      | Si   | Sr   | Ti   | V    | Zn   |
|--------------------------|------|------|-------|------|------|------|------|------|------|------|------|------|------|------|------|------|------|--------|------|------|------|------|------|
| <b>DN-2</b> <sup>1</sup> | 0.01 | 0.00 | 0.77  | 0.00 | 0.00 | 0.00 | 0.00 | 0.06 | 0.01 | 1.39 | 0.00 | 1.33 | 0.24 | 6.73 | 0.07 | 0.01 | 0.00 | 9.94   | 0.71 | 0.17 | 0.02 | 0.00 | 0.01 |
| <b>IŠ</b>                | 0.01 | 0.00 | 0.95  | 0.00 | 0.00 | 0.08 | 0.00 | 0.08 | 0.01 | 1.93 | 0.00 | 0.82 | 0.70 | 7.67 | 0.23 | 0.05 | 0.00 | 7.57   | 0.99 | 1.97 | 0.00 | 0.12 | 0.00 |
| <b>K-4</b>               | 0.00 | 0.00 | 1.35  | 0.00 | 0.00 | 0.00 | 0.00 | 0.04 | 0.00 | 2.12 | 0.00 | 0.17 | 0.29 | 4.50 | 0.10 | 0.04 | 0.00 | 8.31   | 0.84 | 0.16 | 0.00 | 0.00 | 0.00 |
| <b>K-2</b>               | 0.01 | 0.00 | 0.85  | 0.00 | 0.00 | 0.00 | 0.00 | 0.05 | 0.01 | 1.67 | 0.00 | 0.33 | 0.11 | 6.13 | 0.09 | 0.05 | 0.00 | 9.79   | 0.98 | 0.07 | 0.00 | 0.00 | 0.00 |
| <b>38</b>                | 0.01 | 0.00 | 0.98  | 0.00 | 0.00 | 0.00 | 0.00 | 0.05 | 0.01 | 1.79 | 0.00 | 0.63 | 0.36 | 5.29 | 0.06 | 0.06 | 0.00 | 7.04   | 0.81 | 0.93 | 0.00 | 0.10 | 0.00 |
| <b>ČD</b>                | 0.01 | 0.00 | 0.83  | 0.00 | 0.00 | 0.02 | 0.00 | 0.13 | 0.01 | 1.13 | 0.00 | 0.46 | 0.35 | 5.92 | 0.09 | 0.01 | 0.00 | 7.88   | 0.70 | 0.17 | 0.00 | 0.00 | 0.02 |
| <b>44</b>                | 0.01 | 0.00 | 0.86  | 0.00 | 0.32 | 0.00 | 0.00 | 0.06 | 0.01 | 1.97 | 0.00 | 0.81 | 0.14 | 5.84 | 0.08 | 0.05 | 0.00 | 8.94   | 0.94 | 0.57 | 0.00 | 0.00 | 0.04 |
| <b>51</b>                | 0.01 | 0.00 | 1.16  | 0.00 | 0.00 | 0.02 | 0.00 | 0.10 | 0.01 | 1.28 | 0.00 | 0.52 | 0.32 | 6.72 | 0.10 | 0.03 | 0.00 | 7.28   | 0.85 | 1.07 | 0.00 | 0.09 | 0.00 |
| <b>IŠ</b> <sup>2</sup>   | 0.01 | 0.00 | 2.58  | 0.00 | 0.00 | 0.21 | 0.00 | 0.04 | 0.01 | 1.23 | 0.00 | 0.43 | 0.84 | 6.19 | 0.69 | 0.01 | 0.00 | 13.68  | 0.75 | 0.00 | 0.00 | 0.00 | 0.07 |
| <b>44</b>                | 0.20 | 0.00 | 0.32  | 0.00 | 0.00 | 0.05 | 0.12 | 0.01 | 0.05 | 0.45 | 0.00 | 0.06 | 0.80 | 2.18 | 0.18 | 0.03 | 0.00 | 0.94   | 0.39 | 0.00 | 0.89 | 0.00 | 0.00 |
| <b>45</b>                | 0.05 | 1.25 | 3.53  | 0.00 | 0.00 | 0.00 | 2.35 | 0.03 | 0.01 | 2.15 | 0.00 | 0.06 | 2.33 | 2.56 | 0.50 | 0.04 | 0.00 | 13.28  | 1.32 | 0.00 | 0.00 | 0.24 | 0.00 |
| <b>K-2</b>               | 0.03 | 0.00 | 1.41  | 0.00 | 0.00 | 0.10 | 0.00 | 0.02 | 0.01 | 1.19 | 0.00 | 0.06 | 0.58 | 1.71 | 0.12 | 0.03 | 0.00 | 13.30  | 0.83 | 0.00 | 0.00 | 0.13 | 0.12 |
| <b>51</b>                | 0.04 | 0.00 | 4.06  | 0.00 | 0.00 | 0.13 | 0.00 | 0.01 | 0.03 | 1.11 | 0.00 | 0.28 | 0.67 | 2.13 | 0.61 | 0.00 | 0.00 | 1.45   | 0.41 | 0.00 | 0.00 | 0.00 | 0.00 |
| <b>K-5</b>               | 0.01 | 0.00 | 1.82  | 0.00 | 0.00 | 0.00 | 0.00 | 0.06 | 0.01 | 0.54 | 0.00 | 0.17 | 0.32 | 3.00 | 0.06 | 0.01 | 0.00 | 32.57  | 0.43 | 0.00 | 0.00 | 0.00 | 0.02 |
| <b>K-9</b>               | 0.03 | 0.00 | 9.03  | 0.00 | 0.00 | 0.00 | 0.00 | 0.13 | 0.01 | 5.64 | 0.00 | 1.18 | 0.43 | 8.17 | 0.11 | 0.05 | 0.00 | 57.63  | 1.45 | 0.00 | 0.00 | 0.00 | 0.21 |
| <b>38</b>                | 0.03 | 0.69 | 1.05  | 0.00 | 0.00 | 0.00 | 0.00 | 0.02 | 0.01 | 1.17 | 0.00 | 0.08 | 0.26 | 2.75 | 0.00 | 0.03 | 0.00 | 22.69  | 1.23 | 0.00 | 0.00 | 0.00 | 0.00 |
| <b>52</b>                | 0.07 | 0.00 | 1.37  | 0.00 | 0.00 | 0.16 | 0.00 | 0.05 | 0.02 | 0.96 | 0.00 | 0.91 | 0.25 | 3.54 | 0.28 | 0.01 | 0.00 | 5.92   | 0.51 | 0.00 | 0.04 | 0.07 | 0.03 |
| <b>ČD</b>                | 0.14 | 0.00 | 6.79  | 0.00 | 0.00 | 1.25 | 0.00 | 0.01 | 0.04 | 1.69 | 0.00 | 0.12 | 4.51 | 1.65 | 2.89 | 0.03 | 0.00 | 4.43   | 1.25 | 0.00 | 0.49 | 0.00 | 0.09 |
| <b>28</b>                | 0.12 | 0.00 | 1.11  | 0.00 | 0.00 | 0.09 | 0.00 | 0.03 | 0.04 | 0.70 | 0.00 | 0.04 | 0.72 | 1.90 | 0.18 | 0.13 | 0.00 | 6.12   | 0.78 | 0.00 | 0.38 | 0.11 | 0.05 |
| <b>41</b>                | 0.04 | 0.00 | 2.53  | 0.00 | 0.00 | 0.20 | 0.00 | 0.02 | 0.03 | 0.78 | 0.00 | 0.18 | 3.32 | 2.93 | 1.23 | 0.00 | 0.00 | 6.52   | 0.87 | 0.00 | 0.08 | 0.34 | 0.04 |
| <b>49</b>                | 0.00 | 0.00 | 12.13 | 0.00 | 0.00 | 0.00 | 0.00 | 0.07 | 0.01 | 1.87 | 0.00 | 0.92 | 0.57 | 4.80 | 0.30 | 0.00 | 0.00 | 4.46   | 0.92 | 0.00 | 0.00 | 0.00 | 0.00 |
| <b>29</b>                | 0.01 | 0.00 | 0.75  | 0.00 | 0.00 | 0.00 | 0.00 | 0.04 | 0.00 | 0.45 | 0.00 | 0.03 | 0.18 | 3.50 | 0.00 | 0.02 | 0.00 | 19.38  | 0.63 | 0.00 | 0.00 | 0.00 | 0.00 |
| <b>36</b>                | 0.01 | 0.00 | 7.46  | 0.00 | 0.00 | 0.13 | 0.00 | 0.04 | 0.01 | 2.97 | 0.00 | 0.37 | 1.92 | 3.18 | 0.40 | 0.03 | 0.00 | 3.59   | 1.90 | 0.70 | 0.00 | 0.00 | 0.00 |
| <b>K-4</b>               | 0.03 | 0.30 | 1.51  | 0.00 | 0.00 | 0.00 | 0.00 | 0.12 | 0.02 | 3.15 | 0.00 | 0.42 | 0.05 | 4.48 | 0.10 | 0.16 | 0.00 | 158.54 | 1.13 | 0.92 | 0.00 | 0.07 | 0.00 |
| <b>DN-2</b>              | 0.06 | 0.00 | 3.58  | 0.00 | 1.33 | 1.26 | 0.00 | 0.14 | 0.03 | 1.75 | 0.00 | 1.46 | 3.66 | 7.20 | 2.11 | 0.01 | 0.00 | 10.39  | 1.48 | 0.00 | 0.09 | 0.00 | 1.18 |

<sup>1</sup>Fine fraction (from DN-2<sup>1</sup> to 51); <sup>2</sup>Coarse fraction (from IŠ<sup>2</sup> to DN).

Table S2. Relationship between the contents of elements extracted with CH<sub>3</sub>COONH<sub>4</sub> and HNO<sub>3</sub> (%)

|                   | Al   | As   | Ba  | Be   | Ca    | Cd     | Co   | Cr   | Cu    | Fe   | K      | Li   | Mg    | Mn    | Na     | Ni    | P     | Pb   | S       | Si    | Sr     | Ti    | V    | Zn    |
|-------------------|------|------|-----|------|-------|--------|------|------|-------|------|--------|------|-------|-------|--------|-------|-------|------|---------|-------|--------|-------|------|-------|
| DN-2 <sup>1</sup> | 0.59 | 0.00 | 108 | 0.00 | 32.06 | 17.65  | 0.24 | 0.00 | 3.44  | 0.14 | 43.99  | 2.79 | 16.12 | 4.41  | 113.61 | 2.55  | 0.00  | 0.00 | 127.13  | 8.66  | 73.90  | 0.07  | 1.20 | 2.09  |
| IŠ                | 0.12 | 0.00 | 103 | 0.00 | 44.49 | 27.74  | 0.33 | 0.00 | 3.62  | 0.00 | 57.70  | 2.54 | 7.07  | 8.58  | 119.32 | 5.58  | 1.09  | 0.00 | 99.12   | 12.55 | 80.16  | 0.00  | 1.04 | 1.57  |
| K-4               | 0.09 | 0.00 | 130 | 0.00 | 18.61 | 33.81  | 1.01 | 0.00 | 1.95  | 0.09 | 65.58  | 0.47 | 3.34  | 19.21 | 90.58  | 8.45  | 5.14  | 0.00 | 103.96  | 14.47 | 37.57  | 0.00  | 2.92 | 5.08  |
| K-2               | 0.14 | 0.00 | 153 | 0.74 | 16.86 | 25.82  | 1.35 | 0.00 | 1.79  | 0.13 | 66.29  | 0.45 | 6.04  | 15.87 | 108.14 | 6.70  | 5.91  | 0.00 | 122.34  | 20.32 | 41.49  | 0.00  | 4.64 | 3.76  |
| 38                | 0.08 | 0.00 | 131 | 0.00 | 27.27 | 38.06  | 0.39 | 0.00 | 2.57  | 0.00 | 74.47  | 1.12 | 10.34 | 16.04 | 100.56 | 4.20  | 5.58  | 0.00 | 87.81   | 13.62 | 52.94  | 0.00  | 1.19 | 2.18  |
| ČD                | 0.11 | 0.00 | 146 | 0.00 | 51.06 | 32.22  | 0.78 | 0.00 | 4.50  | 0.07 | 44.35  | 2.21 | 6.54  | 12.43 | 111.58 | 6.25  | 0.41  | 0.00 | 90.41   | 11.53 | 74.47  | 0.00  | 2.08 | 5.20  |
| 44                | 0.04 | 0.00 | 119 | 0.00 | 30.91 | 33.33  | 0.32 | 0.00 | 2.59  | 0.10 | 67.42  | 1.09 | 12.99 | 8.09  | 101.25 | 5.09  | 5.80  | 0.00 | 111.04  | 14.62 | 50.24  | 0.00  | 1.92 | 1.79  |
| 51                | 0.15 | 0.00 | 116 | 0.00 | 49.25 | 25.65  | 0.25 | 0.00 | 3.88  | 0.04 | 43.25  | 2.39 | 6.87  | 11.19 | 103.86 | 5.33  | 1.77  | 0.00 | 96.82   | 13.70 | 82.03  | 0.00  | 0.95 | 3.05  |
| IŠ <sup>2</sup>   | 0.26 | 0.00 | 137 | 0.00 | 28.25 | 2.90   | 0.46 | 0.00 | 3.71  | 0.00 | 32.79  | 1.25 | 3.52  | 4.45  | 101.27 | 4.16  | 0.00  | 0.00 | 222.38  | 2.74  | 56.89  | 0.00  | 1.94 | 1.29  |
| 44                | 0.08 | 0.00 | 20  | 0.00 | 10.41 | 8.59   | 0.11 | 0.00 | 1.14  | 0.00 | 12.19  | 0.21 | 0.98  | 17.93 | 56.82  | 3.97  | 0.65  | 0.00 | 8.74    | 1.64  | 21.03  | 0.00  | 1.41 | 0.93  |
| 45                | 1.82 | 0.00 | 209 | 0.00 | 9.73  | 42.22  | 0.58 | 0.00 | 1.71  | 0.23 | 43.07  | 0.35 | 0.68  | 33.57 | 42.90  | 12.38 | 4.67  | 0.00 | 157.98  | 16.76 | 26.35  | 18.17 | 4.45 | 5.07  |
| K-2               | 0.29 | 0.00 | 108 | 0.00 | 16.89 | 28.13  | 0.97 | 0.00 | 1.25  | 0.25 | 32.82  | 0.31 | 0.86  | 20.69 | 82.46  | 9.62  | 3.71  | 0.00 | 118.77  | 8.16  | 30.79  | 0.00  | 3.66 | 5.13  |
| 51                | 0.06 | 0.00 | 211 | 0.00 | 19.85 | 0.00   | 0.27 | 0.00 | 2.34  | 0.00 | 36.17  | 0.59 | 2.19  | 6.34  | 64.19  | 6.79  | 0.00  | 0.00 | 24.74   | 1.99  | 39.81  | 0.00  | 1.45 | 0.83  |
| K-5               | 0.19 | 0.00 | 74  | 0.00 | 45.88 | 13.73  | 0.18 | 0.00 | 2.25  | 0.16 | 14.65  | 0.61 | 1.68  | 13.15 | 83.33  | 2.74  | 0.21  | 0.00 | 348.66  | 3.51  | 68.54  | 0.00  | 1.13 | 2.73  |
| K-9               | 0.58 | 0.00 | 507 | 0.00 | 79.95 | 44.23  | 0.76 | 0.00 | 6.10  | 0.27 | 141.03 | 1.27 | 13.27 | 11.48 | 218.85 | 9.57  | 7.73  | 0.00 | 734.21  | 13.75 | 169.25 | 0.00  | 8.06 | 25.21 |
| 38                | 0.22 | 0.00 | 107 | 0.00 | 25.49 | 100.00 | 0.17 | 0.00 | 2.63  | 0.05 | 51.61  | 0.54 | 1.54  | 22.19 | 120.37 | 6.91  | 5.54  | 0.00 | 331.69  | 17.66 | 59.30  | 0.00  | 6.32 | 12.35 |
| 52                | 0.20 | 0.00 | 91  | 0.00 | 54.63 | 5.33   | 1.01 | 0.00 | 4.97  | 0.00 | 29.40  | 1.34 | 5.96  | 2.11  | 73.89  | 4.21  | 0.00  | 0.00 | 57.68   | 2.09  | 85.11  | 0.00  | 0.26 | 4.93  |
| ČD                | 0.77 | 0.00 | 345 | 0.00 | 4.86  | 0.00   | 1.80 | 0.00 | 1.20  | 0.00 | 40.46  | 0.42 | 0.86  | 21.09 | 31.69  | 15.96 | 0.00  | 0.00 | 39.27   | 3.99  | 15.90  | 0.00  | 3.05 | 1.77  |
| 28                | 0.20 | 0.00 | 59  | 0.00 | 20.05 | 41.89  | 0.36 | 0.00 | 1.89  | 0.05 | 23.54  | 0.33 | 0.77  | 23.82 | 77.51  | 6.45  | 5.23  | 0.00 | 111.00  | 6.06  | 27.96  | 0.00  | 4.38 | 11.31 |
| 41                | 0.23 | 0.00 | 94  | 0.00 | 13.55 | 14.89  | 0.61 | 0.00 | 1.78  | 0.33 | 25.54  | 0.31 | 1.35  | 31.93 | 92.66  | 9.01  | 0.00  | 0.00 | 87.10   | 6.42  | 43.66  | 0.00  | 1.72 | 1.51  |
| 49                | 0.22 | 0.00 | 531 | 5.80 | 69.39 | 15.38  | 0.00 | 0.00 | 6.39  | 0.08 | 70.82  | 1.59 | 4.75  | 5.42  | 178.25 | 4.26  | 0.00  | 0.00 | 59.42   | 10.27 | 127.30 | 0.00  | 2.74 | 1.37  |
| 29                | 0.35 | 0.00 | 48  | 0.00 | 28.03 | 64.71  | 1.29 | 0.00 | 11.27 | 0.07 | 18.64  | 0.42 | 0.71  | 23.57 | 78.04  | 8.34  | 3.05  | 0.00 | 231.51  | 6.40  | 36.94  | 0.00  | 3.12 | 10.32 |
| 36                | 0.48 | 0.00 | 420 | 2.90 | 22.85 | 27.06  | 0.00 | 0.00 | 2.25  | 0.00 | 96.31  | 0.56 | 2.58  | 20.54 | 100.47 | 9.97  | 3.61  | 0.00 | 52.70   | 15.60 | 63.06  | 0.00  | 1.91 | 3.01  |
| K-4               | 0.23 | 0.00 | 164 | 0.00 | 55.45 | 46.15  | 0.34 | 0.00 | 4.48  | 0.18 | 93.77  | 1.02 | 6.97  | 5.00  | 79.50  | 5.12  | 11.02 | 0.00 | 1656.50 | 15.16 | 110.25 | 0.00  | 5.29 | 11.11 |
| DN-2              | 0.12 | 0.00 | 133 | 0.83 | 15.30 | 1.33   | 0.00 | 0.00 | 5.43  | 0.00 | 29.01  | 1.53 | 6.86  | 4.04  | 87.58  | 4.22  | 0.00  | 0.00 | 126.63  | 4.28  | 45.91  | 0.00  | 0.49 | 5.59  |

<sup>1</sup>Fine fraction (from DN-2<sup>1</sup> to 51); <sup>2</sup>Coarse fraction (from IŠ<sup>2</sup> to DN).

**Table S3.** Relationship between the contents of elements extracted with CaCl<sub>2</sub> and CH<sub>3</sub>COONH<sub>4</sub> (%).

|                          | Al   | As   | Ba  | Be   | Ca    | Cd     | Co   | Cr   | Cu    | Fe   | K      | Li   | Mg    | Mn    | Na     | Ni    | P     | Pb   | S       | Si    | Sr     | Ti    | V    | Zn    |
|--------------------------|------|------|-----|------|-------|--------|------|------|-------|------|--------|------|-------|-------|--------|-------|-------|------|---------|-------|--------|-------|------|-------|
| <b>DN-2</b> <sup>1</sup> | 0.59 | 0.00 | 108 | 0.00 | 32.06 | 17.65  | 0.24 | 0.00 | 3.44  | 0.14 | 43.99  | 2.79 | 16.12 | 4.41  | 113.61 | 2.55  | 0.00  | 0.00 | 127.13  | 8.66  | 73.90  | 0.07  | 1.20 | 2.09  |
| <b>IŠ</b>                | 0.12 | 0.00 | 103 | 0.00 | 44.49 | 27.74  | 0.33 | 0.00 | 3.62  | 0.00 | 57.70  | 2.54 | 7.07  | 8.58  | 119.32 | 5.58  | 1.09  | 0.00 | 99.12   | 12.55 | 80.16  | 0.00  | 1.04 | 1.57  |
| <b>K-4</b>               | 0.09 | 0.00 | 130 | 0.00 | 18.61 | 33.81  | 1.01 | 0.00 | 1.95  | 0.09 | 65.58  | 0.47 | 3.34  | 19.21 | 90.58  | 8.45  | 5.14  | 0.00 | 103.96  | 14.47 | 37.57  | 0.00  | 2.92 | 5.08  |
| <b>K-2</b>               | 0.14 | 0.00 | 153 | 0.74 | 16.86 | 25.82  | 1.35 | 0.00 | 1.79  | 0.13 | 66.29  | 0.45 | 6.04  | 15.87 | 108.14 | 6.70  | 5.91  | 0.00 | 122.34  | 20.32 | 41.49  | 0.00  | 4.64 | 3.76  |
| <b>38</b>                | 0.08 | 0.00 | 131 | 0.00 | 27.27 | 38.06  | 0.39 | 0.00 | 2.57  | 0.00 | 74.47  | 1.12 | 10.34 | 16.04 | 100.56 | 4.20  | 5.58  | 0.00 | 87.81   | 13.62 | 52.94  | 0.00  | 1.19 | 2.18  |
| <b>ČD</b>                | 0.11 | 0.00 | 146 | 0.00 | 51.06 | 32.22  | 0.78 | 0.00 | 4.50  | 0.07 | 44.35  | 2.21 | 6.54  | 12.43 | 111.58 | 6.25  | 0.41  | 0.00 | 90.41   | 11.53 | 74.47  | 0.00  | 2.08 | 5.20  |
| <b>44</b>                | 0.04 | 0.00 | 119 | 0.00 | 30.91 | 33.33  | 0.32 | 0.00 | 2.59  | 0.10 | 67.42  | 1.09 | 12.99 | 8.09  | 101.25 | 5.09  | 5.80  | 0.00 | 111.04  | 14.62 | 50.24  | 0.00  | 1.92 | 1.79  |
| <b>51</b>                | 0.15 | 0.00 | 116 | 0.00 | 49.25 | 25.65  | 0.25 | 0.00 | 3.88  | 0.04 | 43.25  | 2.39 | 6.87  | 11.19 | 103.86 | 5.33  | 1.77  | 0.00 | 96.82   | 13.70 | 82.03  | 0.00  | 0.95 | 3.05  |
| <b>IŠ</b> <sup>2</sup>   | 0.26 | 0.00 | 137 | 0.00 | 28.25 | 2.90   | 0.46 | 0.00 | 3.71  | 0.00 | 32.79  | 1.25 | 3.52  | 4.45  | 101.27 | 4.16  | 0.00  | 0.00 | 222.38  | 2.74  | 56.89  | 0.00  | 1.94 | 1.29  |
| <b>44</b>                | 0.08 | 0.00 | 20  | 0.00 | 10.41 | 8.59   | 0.11 | 0.00 | 1.14  | 0.00 | 12.19  | 0.21 | 0.98  | 17.93 | 56.82  | 3.97  | 0.65  | 0.00 | 8.74    | 1.64  | 21.03  | 0.00  | 1.41 | 0.93  |
| <b>45</b>                | 1.82 | 0.00 | 209 | 0.00 | 9.73  | 42.22  | 0.58 | 0.00 | 1.71  | 0.23 | 43.07  | 0.35 | 0.68  | 33.57 | 42.90  | 12.38 | 4.67  | 0.00 | 157.98  | 16.76 | 26.35  | 18.17 | 4.45 | 5.07  |
| <b>K-2</b>               | 0.29 | 0.00 | 108 | 0.00 | 16.89 | 28.13  | 0.97 | 0.00 | 1.25  | 0.25 | 32.82  | 0.31 | 0.86  | 20.69 | 82.46  | 9.62  | 3.71  | 0.00 | 118.77  | 8.16  | 30.79  | 0.00  | 3.66 | 5.13  |
| <b>51</b>                | 0.06 | 0.00 | 211 | 0.00 | 19.85 | 0.00   | 0.27 | 0.00 | 2.34  | 0.00 | 36.17  | 0.59 | 2.19  | 6.34  | 64.19  | 6.79  | 0.00  | 0.00 | 24.74   | 1.99  | 39.81  | 0.00  | 1.45 | 0.83  |
| <b>K-5</b>               | 0.19 | 0.00 | 74  | 0.00 | 45.88 | 13.73  | 0.18 | 0.00 | 2.25  | 0.16 | 14.65  | 0.61 | 1.68  | 13.15 | 83.33  | 2.74  | 0.21  | 0.00 | 348.66  | 3.51  | 68.54  | 0.00  | 1.13 | 2.73  |
| <b>K-9</b>               | 0.58 | 0.00 | 507 | 0.00 | 79.95 | 44.23  | 0.76 | 0.00 | 6.10  | 0.27 | 141.03 | 1.27 | 13.27 | 11.48 | 218.85 | 9.57  | 7.73  | 0.00 | 734.21  | 13.75 | 169.25 | 0.00  | 8.06 | 25.21 |
| <b>38</b>                | 0.22 | 0.00 | 107 | 0.00 | 25.49 | 100.00 | 0.17 | 0.00 | 2.63  | 0.05 | 51.61  | 0.54 | 1.54  | 22.19 | 120.37 | 6.91  | 5.54  | 0.00 | 331.69  | 17.66 | 59.30  | 0.00  | 6.32 | 12.35 |
| <b>52</b>                | 0.20 | 0.00 | 91  | 0.00 | 54.63 | 5.33   | 1.01 | 0.00 | 4.97  | 0.00 | 29.40  | 1.34 | 5.96  | 2.11  | 73.89  | 4.21  | 0.00  | 0.00 | 57.68   | 2.09  | 85.11  | 0.00  | 0.26 | 4.93  |
| <b>ČD</b>                | 0.77 | 0.00 | 345 | 0.00 | 4.86  | 0.00   | 1.80 | 0.00 | 1.20  | 0.00 | 40.46  | 0.42 | 0.86  | 21.09 | 31.69  | 15.96 | 0.00  | 0.00 | 39.27   | 3.99  | 15.90  | 0.00  | 3.05 | 1.77  |
| <b>28</b>                | 0.20 | 0.00 | 59  | 0.00 | 20.05 | 41.89  | 0.36 | 0.00 | 1.89  | 0.05 | 23.54  | 0.33 | 0.77  | 23.82 | 77.51  | 6.45  | 5.23  | 0.00 | 111.00  | 6.06  | 27.96  | 0.00  | 4.38 | 11.31 |
| <b>41</b>                | 0.23 | 0.00 | 94  | 0.00 | 13.55 | 14.89  | 0.61 | 0.00 | 1.78  | 0.33 | 25.54  | 0.31 | 1.35  | 31.93 | 92.66  | 9.01  | 0.00  | 0.00 | 87.10   | 6.42  | 43.66  | 0.00  | 1.72 | 1.51  |
| <b>49</b>                | 0.22 | 0.00 | 531 | 5.80 | 69.39 | 15.38  | 0.00 | 0.00 | 6.39  | 0.08 | 70.82  | 1.59 | 4.75  | 5.42  | 178.25 | 4.26  | 0.00  | 0.00 | 59.42   | 10.27 | 127.30 | 0.00  | 2.74 | 1.37  |
| <b>29</b>                | 0.35 | 0.00 | 48  | 0.00 | 28.03 | 64.71  | 1.29 | 0.00 | 11.27 | 0.07 | 18.64  | 0.42 | 0.71  | 23.57 | 78.04  | 8.34  | 3.05  | 0.00 | 231.51  | 6.40  | 36.94  | 0.00  | 3.12 | 10.32 |
| <b>36</b>                | 0.48 | 0.00 | 420 | 2.90 | 22.85 | 27.06  | 0.00 | 0.00 | 2.25  | 0.00 | 96.31  | 0.56 | 2.58  | 20.54 | 100.47 | 9.97  | 3.61  | 0.00 | 52.70   | 15.60 | 63.06  | 0.00  | 1.91 | 3.01  |
| <b>K-4</b>               | 0.23 | 0.00 | 164 | 0.00 | 55.45 | 46.15  | 0.34 | 0.00 | 4.48  | 0.18 | 93.77  | 1.02 | 6.97  | 5.00  | 79.50  | 5.12  | 11.02 | 0.00 | 1656.50 | 15.16 | 110.25 | 0.00  | 5.29 | 11.11 |
| <b>DN-2</b>              | 0.12 | 0.00 | 133 | 0.83 | 15.30 | 1.33   | 0.00 | 0.00 | 5.43  | 0.00 | 29.01  | 1.53 | 6.86  | 4.04  | 87.58  | 4.22  | 0.00  | 0.00 | 126.63  | 4.28  | 45.91  | 0.00  | 0.49 | 5.59  |

<sup>1</sup>Fine fraction (from DN-2<sup>1</sup> to 51); <sup>2</sup>Coarse fraction (from IŠ<sup>2</sup> to DN).

**Table S4.** Relationship between the contents of elements extracted with CaCl<sub>2</sub> and total element content – BCR extraction (%).

|                          | Al   | As   | Ba   | Be   | Cd   | Co   | Cr   | Cu   | Fe   | K    | Li   | Mg   | Mn   | Na   | Ni   | P    | Pb   | S     | Si   | Sr   | Ti   | V    | Zn   |
|--------------------------|------|------|------|------|------|------|------|------|------|------|------|------|------|------|------|------|------|-------|------|------|------|------|------|
| <b>DN-2</b> <sup>1</sup> | 0.00 | 0.00 | 0.35 | 0.00 | 0.03 | 0.00 | 0.00 | 0.02 | 0.00 | 0.25 | 0.00 | 0.85 | 0.14 | 2.52 | 0.01 | 0.00 | 0.00 | 2.06  | 0.29 | 0.11 | 0.00 | 0.00 | 0.00 |
| <b>IŠ</b>                | 0.00 | 0.00 | 0.10 | 0.00 | 0.12 | 0.03 | 0.00 | 0.04 | 0.00 | 0.29 | 0.00 | 0.53 | 0.35 | 3.55 | 0.04 | 0.00 | 0.00 | 1.43  | 0.52 | 0.89 | 0.00 | 0.01 | 0.00 |
| <b>K-4</b>               | 0.00 | 0.00 | 0.29 | 0.00 | 0.02 | 0.00 | 0.00 | 0.11 | 0.00 | 0.46 | 0.00 | 0.15 | 0.15 | 2.32 | 0.02 | 0.00 | 0.00 | 2.91  | 0.43 | 0.12 | 0.00 | 0.00 | 0.00 |
| <b>52</b>                | 0.00 | 0.01 | 0.33 | 0.00 | 0.00 | 0.00 | 0.00 | 0.07 | 0.00 | 0.19 | 0.00 | 0.18 | 0.10 | 1.15 | 0.01 | 0.00 | 0.00 | 2.92  | 0.26 | 0.00 | 0.00 | 0.00 | 0.00 |
| <b>K-2</b>               | 0.00 | 0.00 | 0.15 | 0.00 | 0.00 | 0.01 | 0.00 | 0.11 | 0.00 | 0.35 | 0.00 | 0.29 | 0.05 | 2.44 | 0.01 | 0.00 | 0.00 | 3.81  | 0.42 | 0.05 | 0.00 | 0.00 | 0.00 |
| <b>38</b>                | 0.00 | 0.00 | 0.32 | 0.00 | 0.05 | 0.00 | 0.00 | 0.06 | 0.00 | 0.37 | 0.00 | 0.47 | 0.17 | 2.26 | 0.01 | 0.00 | 0.00 | 1.43  | 0.42 | 0.68 | 0.00 | 0.01 | 0.00 |
| <b>ČD</b>                | 0.00 | 0.00 | 0.14 | 0.00 | 0.04 | 0.01 | 0.00 | 0.07 | 0.00 | 0.20 | 0.00 | 0.28 | 0.18 | 2.08 | 0.02 | 0.00 | 0.00 | 2.81  | 0.33 | 0.10 | 0.00 | 0.00 | 0.01 |
| <b>44</b>                | 0.00 | 0.00 | 0.42 | 0.00 | 0.16 | 0.00 | 0.00 | 0.07 | 0.00 | 0.46 | 0.00 | 0.53 | 0.07 | 3.09 | 0.02 | 0.00 | 0.00 | 2.10  | 0.47 | 0.43 | 0.00 | 0.00 | 0.02 |
| <b>51</b>                | 0.00 | 0.00 | 0.18 | 0.00 | 0.02 | 0.01 | 0.00 | 0.05 | 0.00 | 0.26 | 0.00 | 0.33 | 0.17 | 2.72 | 0.02 | 0.00 | 0.00 | 1.04  | 0.33 | 0.63 | 0.00 | 0.01 | 0.00 |
| <b>DN-2</b> <sup>2</sup> | 0.00 | 0.00 | 1.39 | 0.00 | 0.43 | 0.35 | 0.00 | 0.04 | 0.00 | 0.28 | 0.00 | 0.97 | 1.31 | 1.67 | 0.28 | 0.00 | 0.00 | 0.82  | 0.37 | 0.00 | 0.00 | 0.00 | 0.21 |
| <b>IŠ</b>                | 0.00 | 0.00 | 1.00 | 0.00 | 0.08 | 0.07 | 0.00 | 0.02 | 0.00 | 0.16 | 0.00 | 0.35 | 0.21 | 1.44 | 0.09 | 0.00 | 0.00 | 0.83  | 0.21 | 0.00 | 0.00 | 0.00 | 0.01 |
| <b>K-4</b>               | 0.01 | 0.00 | 0.06 | 0.00 | 0.00 | 0.02 | 0.01 | 0.02 | 0.01 | 0.08 | 0.00 | 0.05 | 0.29 | 0.80 | 0.02 | 0.00 | 0.00 | 0.16  | 0.12 | 0.00 | 0.05 | 0.00 | 0.00 |
| <b>52</b>                | 0.00 | 0.08 | 1.44 | 0.00 | 0.00 | 0.00 | 0.03 | 0.06 | 0.00 | 0.45 | 0.00 | 0.06 | 0.97 | 1.41 | 0.05 | 0.00 | 0.00 | 2.50  | 0.27 | 0.00 | 0.00 | 0.02 | 0.00 |
| <b>K-2</b>               | 0.00 | 0.00 | 0.56 | 0.00 | 0.06 | 0.03 | 0.00 | 0.13 | 0.00 | 0.30 | 0.00 | 0.08 | 0.21 | 0.89 | 0.02 | 0.00 | 0.00 | 6.53  | 0.41 | 0.00 | 0.00 | 0.02 | 0.04 |
| <b>38</b>                | 0.00 | 0.00 | 1.40 | 0.00 | 0.01 | 0.04 | 0.00 | 0.02 | 0.00 | 0.23 | 0.00 | 0.25 | 0.32 | 0.88 | 0.09 | 0.00 | 0.00 | 0.29  | 0.22 | 0.00 | 0.00 | 0.00 | 0.00 |
| <b>ČD</b>                | 0.00 | 0.00 | 0.76 | 0.00 | 0.00 | 0.01 | 0.00 | 0.03 | 0.00 | 0.09 | 0.00 | 0.14 | 0.07 | 0.79 | 0.00 | 0.00 | 0.00 | 2.51  | 0.11 | 0.00 | 0.00 | 0.00 | 0.00 |
| <b>44</b>                | 0.00 | 0.00 | 2.73 | 0.00 | 0.03 | 0.01 | 0.00 | 0.17 | 0.00 | 1.04 | 0.00 | 0.91 | 0.14 | 3.96 | 0.02 | 0.00 | 0.00 | 12.51 | 0.34 | 0.00 | 0.00 | 0.00 | 0.07 |
| <b>51</b>                | 0.00 | 0.02 | 0.43 | 0.00 | 0.00 | 0.00 | 0.00 | 0.02 | 0.00 | 0.30 | 0.00 | 0.08 | 0.07 | 0.98 | 0.00 | 0.00 | 0.00 | 2.17  | 0.34 | 0.00 | 0.00 | 0.00 | 0.00 |
| <b>45</b>                | 0.01 | 0.00 | 0.40 | 0.00 | 0.00 | 0.05 | 0.00 | 0.02 | 0.00 | 0.33 | 0.00 | 0.89 | 0.09 | 1.55 | 0.05 | 0.00 | 0.00 | 1.33  | 0.17 | 0.00 | 0.00 | 0.01 | 0.01 |
| <b>K-5</b>               | 0.01 | 0.01 | 3.71 | 0.00 | 0.05 | 0.36 | 0.00 | 0.07 | 0.00 | 0.34 | 0.00 | 0.11 | 1.64 | 0.88 | 0.31 | 0.00 | 0.00 | 2.02  | 0.22 | 0.00 | 0.02 | 0.00 | 0.02 |
| <b>K-9</b>               | 0.01 | 0.00 | 0.63 | 0.00 | 0.04 | 0.05 | 0.01 | 0.14 | 0.01 | 0.28 | 0.00 | 0.05 | 0.45 | 1.30 | 0.03 | 0.01 | 0.00 | 2.59  | 0.39 | 0.00 | 0.03 | 0.01 | 0.02 |
| <b>28</b>                | 0.00 | 0.00 | 1.19 | 0.00 | 0.18 | 0.09 | 0.00 | 0.08 | 0.00 | 0.24 | 0.00 | 0.20 | 1.71 | 1.44 | 0.20 | 0.00 | 0.00 | 2.64  | 0.36 | 0.00 | 0.01 | 0.05 | 0.02 |
| <b>41</b>                | 0.00 | 0.00 | 6.28 | 0.00 | 0.10 | 0.00 | 0.00 | 0.11 | 0.00 | 0.56 | 0.00 | 0.96 | 0.35 | 2.30 | 0.06 | 0.00 | 0.00 | 1.30  | 0.29 | 0.00 | 0.00 | 0.00 | 0.00 |
| <b>49</b>                | 0.00 | 0.00 | 0.40 | 0.00 | 0.00 | 0.00 | 0.00 | 0.08 | 0.00 | 0.07 | 0.00 | 0.03 | 0.08 | 1.27 | 0.00 | 0.00 | 0.00 | 4.49  | 0.20 | 0.00 | 0.00 | 0.00 | 0.00 |
| <b>29</b>                | 0.00 | 0.00 | 4.39 | 0.00 | 0.14 | 0.03 | 0.00 | 0.17 | 0.00 | 1.03 | 0.00 | 0.81 | 0.92 | 2.27 | 0.08 | 0.00 | 0.00 | 1.98  | 0.80 | 0.76 | 0.00 | 0.01 | 0.00 |
| <b>36</b>                | 0.00 | 0.02 | 0.76 | 0.00 | 0.00 | 0.00 | 0.00 | 0.13 | 0.00 | 0.68 | 0.00 | 0.38 | 0.01 | 2.47 | 0.02 | 0.00 | 0.00 | 10.39 | 0.65 | 0.70 | 0.00 | 0.01 | 0.00 |

<sup>1</sup> Fine fraction (from DN-2<sup>1</sup> to 51); <sup>2</sup> Coarse fraction (from DN-2<sup>2</sup> to 36).

**Table S5.** Relationship between the contents of elements extracted with CH<sub>3</sub>COONH<sub>4</sub> and total element content – BCR extraction (%).

|                          | Al   | As   | Ba    | Be   | Cd    | Co    | Cr   | Cu   | Fe   | K    | Li    | Mg   | Mn    | Na    | Ni    | P    | Pb   | S    | Si    | Sr   | Ti    | V    | Zn   |
|--------------------------|------|------|-------|------|-------|-------|------|------|------|------|-------|------|-------|-------|-------|------|------|------|-------|------|-------|------|------|
| <b>DN-2</b> <sup>1</sup> | 0.06 | 0.00 | 49.69 | 0.02 | 30.65 | 7.14  | 0.10 | 0.00 | 1.32 | 0.02 | 7.95  | 0.25 | 10.29 | 2.50  | 42.61 | 0.52 | 0.00 | 0.00 | 26.39 | 3.52 | 48.25 | 0.00 | 0.14 |
| <b>IŠ</b>                | 0.01 | 0.00 | 10.44 | 0.00 | 47.43 | 11.81 | 0.13 | 0.00 | 1.81 | 0.00 | 8.64  | 0.35 | 4.53  | 4.33  | 55.14 | 1.04 | 0.04 | 0.00 | 18.64 | 6.56 | 35.91 | 0.00 | 0.10 |
| <b>K-4</b>               | 0.01 | 0.00 | 27.99 | 0.04 | 16.15 | 17.98 | 0.39 | 0.00 | 4.77 | 0.01 | 14.15 | 0.17 | 2.95  | 10.00 | 46.57 | 1.21 | 0.21 | 0.00 | 36.41 | 7.37 | 28.06 | 0.00 | 0.29 |
| <b>52</b>                | 0.01 | 0.00 | 58.32 | 0.15 | 18.54 | 14.80 | 0.05 | 0.00 | 2.98 | 0.00 | 8.18  | 0.29 | 2.95  | 5.58  | 21.45 | 1.16 | 0.04 | 0.00 | 32.14 | 4.63 | 36.70 | 0.00 | 0.14 |
| <b>K-2</b>               | 0.01 | 0.00 | 26.26 | 0.21 | 18.33 | 13.52 | 0.47 | 0.00 | 3.90 | 0.02 | 13.97 | 0.19 | 5.26  | 6.67  | 43.01 | 1.02 | 0.23 | 0.00 | 47.69 | 8.76 | 31.82 | 0.00 | 0.55 |
| <b>38</b>                | 0.01 | 0.00 | 42.61 | 0.00 | 27.87 | 21.00 | 0.13 | 0.00 | 3.05 | 0.00 | 15.59 | 0.35 | 7.72  | 7.60  | 42.92 | 0.65 | 0.24 | 0.00 | 17.86 | 6.98 | 38.67 | 0.00 | 0.14 |
| <b>ČD</b>                | 0.01 | 0.00 | 24.73 | 0.00 | 47.50 | 15.58 | 0.33 | 0.00 | 2.43 | 0.01 | 7.71  | 0.27 | 3.92  | 6.38  | 39.31 | 1.29 | 0.02 | 0.00 | 32.31 | 5.38 | 43.08 | 0.00 | 0.18 |
| <b>44</b>                | /    | 0.00 | 58.47 | 0.00 | 26.93 | 19.87 | 0.12 | 0.00 | 2.99 | 0.01 | 15.59 | 0.34 | 8.51  | 3.89  | 53.49 | 1.03 | 0.22 | 0.00 | 26.03 | 7.37 | 37.85 | 0.00 | 0.26 |
| <b>51</b>                | 0.01 | 0.00 | 18.05 | 0.00 | 46.58 | 11.13 | 0.11 | 0.00 | 2.07 | 0.00 | 8.89  | 0.35 | 4.34  | 5.96  | 42.08 | 1.02 | 0.06 | 0.00 | 13.83 | 5.26 | 48.06 | 0.00 | 0.10 |
| <b>DN-2</b> <sup>2</sup> | 0.06 | 0.00 | 49.69 | 0.02 | 30.65 | 7.14  | 0.10 | 0.00 | 1.32 | 0.02 | 7.95  | 0.25 | 10.29 | 2.50  | 42.61 | 0.52 | 0.00 | 0.00 | 26.39 | 3.52 | 48.25 | 0.00 | 0.14 |
| <b>IŠ</b>                | 0.01 | 0.00 | 10.44 | 0.00 | 47.43 | 11.81 | 0.13 | 0.00 | 1.81 | 0.00 | 8.64  | 0.35 | 4.53  | 4.33  | 55.14 | 1.04 | 0.04 | 0.00 | 18.64 | 6.56 | 35.91 | 0.00 | 0.10 |
| <b>K-4</b>               | 0.01 | 0.00 | 27.99 | 0.04 | 16.15 | 17.98 | 0.39 | 0.00 | 4.77 | 0.01 | 14.15 | 0.17 | 2.95  | 10.00 | 46.57 | 1.21 | 0.21 | 0.00 | 36.41 | 7.37 | 28.06 | 0.00 | 0.29 |
| <b>52</b>                | 0.01 | 0.00 | 58.32 | 0.15 | 18.54 | 14.80 | 0.05 | 0.00 | 2.98 | 0.00 | 8.18  | 0.29 | 2.95  | 5.58  | 21.45 | 1.16 | 0.04 | 0.00 | 32.14 | 4.63 | 36.70 | 0.00 | 0.14 |
| <b>K-2</b>               | 0.01 | 0.00 | 26.26 | 0.21 | 18.33 | 13.52 | 0.47 | 0.00 | 3.90 | 0.02 | 13.97 | 0.19 | 5.26  | 6.67  | 43.01 | 1.02 | 0.23 | 0.00 | 47.69 | 8.76 | 31.82 | 0.00 | 0.55 |
| <b>38</b>                | 0.01 | 0.00 | 42.61 | 0.00 | 27.87 | 21.00 | 0.13 | 0.00 | 3.05 | 0.00 | 15.59 | 0.35 | 7.72  | 7.60  | 42.92 | 0.65 | 0.24 | 0.00 | 17.86 | 6.98 | 38.67 | 0.00 | 0.14 |
| <b>ČD</b>                | 0.01 | 0.00 | 24.73 | 0.00 | 47.50 | 15.58 | 0.33 | 0.00 | 2.43 | 0.01 | 7.71  | 0.27 | 3.92  | 6.38  | 39.31 | 1.29 | 0.02 | 0.00 | 32.31 | 5.38 | 43.08 | 0.00 | 0.18 |
| <b>44</b>                | /    | 0.00 | 58.47 | 0.00 | 26.93 | 19.87 | 0.12 | 0.00 | 2.99 | 0.01 | 15.59 | 0.34 | 8.51  | 3.89  | 53.49 | 1.03 | 0.22 | 0.00 | 26.03 | 7.37 | 37.85 | 0.00 | 0.26 |
| <b>51</b>                | 0.01 | 0.00 | 18.05 | 0.00 | 46.58 | 11.13 | 0.11 | 0.00 | 2.07 | 0.00 | 8.89  | 0.35 | 4.34  | 5.96  | 42.08 | 1.02 | 0.06 | 0.00 | 13.83 | 5.26 | 48.06 | 0.00 | 0.10 |
| <b>45</b>                | 0.06 | 0.00 | 49.69 | 0.02 | 30.65 | 7.14  | 0.10 | 0.00 | 1.32 | 0.02 | 7.95  | 0.25 | 10.29 | 2.50  | 42.61 | 0.52 | 0.00 | 0.00 | 26.39 | 3.52 | 48.25 | 0.00 | 0.14 |
| <b>K-5</b>               | 0.01 | 0.00 | 10.44 | 0.00 | 47.43 | 11.81 | 0.13 | 0.00 | 1.81 | 0.00 | 8.64  | 0.35 | 4.53  | 4.33  | 55.14 | 1.04 | 0.04 | 0.00 | 18.64 | 6.56 | 35.91 | 0.00 | 0.10 |
| <b>K-9</b>               | 0.01 | 0.00 | 27.99 | 0.04 | 16.15 | 17.98 | 0.39 | 0.00 | 4.77 | 0.01 | 14.15 | 0.17 | 2.95  | 10.00 | 46.57 | 1.21 | 0.21 | 0.00 | 36.41 | 7.37 | 28.06 | 0.00 | 0.29 |
| <b>28</b>                | 0.01 | 0.00 | 58.32 | 0.15 | 18.54 | 14.80 | 0.05 | 0.00 | 2.98 | 0.00 | 8.18  | 0.29 | 2.95  | 5.58  | 21.45 | 1.16 | 0.04 | 0.00 | 32.14 | 4.63 | 36.70 | 0.00 | 0.14 |
| <b>41</b>                | 0.01 | 0.00 | 26.26 | 0.21 | 18.33 | 13.52 | 0.47 | 0.00 | 3.90 | 0.02 | 13.97 | 0.19 | 5.26  | 6.67  | 43.01 | 1.02 | 0.23 | 0.00 | 47.69 | 8.76 | 31.82 | 0.00 | 0.55 |
| <b>49</b>                | 0.01 | 0.00 | 42.61 | 0.00 | 27.87 | 21.00 | 0.13 | 0.00 | 3.05 | 0.00 | 15.59 | 0.35 | 7.72  | 7.60  | 42.92 | 0.65 | 0.24 | 0.00 | 17.86 | 6.98 | 38.67 | 0.00 | 0.14 |
| <b>29</b>                | 0.01 | 0.00 | 24.73 | 0.00 | 47.50 | 15.58 | 0.33 | 0.00 | 2.43 | 0.01 | 7.71  | 0.27 | 3.92  | 6.38  | 39.31 | 1.29 | 0.02 | 0.00 | 32.31 | 5.38 | 43.08 | 0.00 | 0.18 |
| <b>36</b>                | /    | 0.00 | 58.47 | 0.00 | 26.93 | 19.87 | 0.12 | 0.00 | 2.99 | 0.01 | 15.59 | 0.34 | 8.51  | 3.89  | 53.49 | 1.03 | 0.22 | 0.00 | 26.03 | 7.37 | 37.85 | 0.00 | 0.26 |

<sup>1</sup> Fine fraction (from DN-2<sup>1</sup> to 51); <sup>2</sup> Coarse fraction (from DN-2<sup>2</sup> to 36).

Table S6. Relationship between the contents of elements extracted with HNO<sub>3</sub> and total element content – BCR extraction (%).

|                         | Al   | As   | Ba   | Be   | Ca    | Cd   | Co   | Cr   | Cu  | Fe   | K    | Li   | Mg    | Mn   | Na   | Ni   | P   | Pb    | S    | Si   | Sr    | Ti   | V    | Zn   |
|-------------------------|------|------|------|------|-------|------|------|------|-----|------|------|------|-------|------|------|------|-----|-------|------|------|-------|------|------|------|
| <b>DN-2<sub>1</sub></b> | 9.3  | 9.9  | 45.9 | 33.1 | 95.6  | 40.4 | 41.0 | 6.3  | 39  | 10.8 | 16.4 | 9.0  | 63.8  | 56.8 | 37.5 | 20.3 | 2.7 | 49.8  | 20.7 | 40.7 | 65.2  | 5.6  | 11.1 | 32.9 |
| <b>IŠ</b>               | 9.3  | 18.2 | 10.2 | 29.7 | 106.6 | 43.0 | 40.8 | 3.6  | 50  | 9.1  | 12.8 | 13.8 | 64.0  | 50.3 | 46.2 | 18.6 | 4.0 | 51.8  | 18.8 | 52.3 | 44.9  | 6.1  | 9.6  | 24.9 |
| <b>K-4</b>              | 8.3  | 23.7 | 21.6 | 33.8 | 86.8  | 53.3 | 37.7 | 6.3  | 245 | 7.9  | 18.3 | 36.8 | 88.3  | 52.0 | 51.4 | 14.4 | 4.1 | 51.6  | 35.2 | 50.9 | 74.8  | 6.7  | 10.1 | 34.7 |
| <b>K-2</b>              | 8.4  | 18.2 | 17.1 | 35.8 | 108.8 | 52.0 | 35.0 | 7.5  | 218 | 12.7 | 18.5 | 41.8 | 87.2  | 41.9 | 39.7 | 15.2 | 3.8 | 47.2  | 39.0 | 43.1 | 76.7  | 7.2  | 11.9 | 34.4 |
| <b>38</b>               | 10.4 | 12.2 | 32.6 | 44.2 | 102.2 | 55.4 | 34.2 | 41.2 | 119 | 13.5 | 18.6 | 31.0 | 74.6  | 47.4 | 42.6 | 15.4 | 4.3 | 49.1  | 20.3 | 51.4 | 73.0  | 10.2 | 11.8 | 36.7 |
| <b>ČD</b>               | 7.9  | 27.8 | 16.9 | 34.0 | 93.0  | 48.6 | 42.3 | 5.2  | 54  | 10.2 | 15.2 | 12.2 | 59.8  | 51.3 | 35.2 | 20.6 | 4.0 | 53.1  | 35.6 | 46.7 | 58.0  | 8.0  | 8.6  | 28.3 |
| <b>44</b>               | 11.0 | 10.7 | 49.2 | 42.4 | 87.1  | 59.3 | 39.4 | 15.6 | 115 | 12.9 | 20.1 | 31.0 | 65.5  | 48.1 | 52.8 | 20.2 | 3.7 | 50.4  | 23.4 | 50.6 | 75.2  | 5.7  | 13.7 | 36.5 |
| <b>51</b>               | 9.4  | 10.1 | 15.5 | 32.0 | 94.6  | 43.4 | 43.6 | 4.1  | 53  | 8.3  | 18.3 | 14.5 | 63.1  | 53.2 | 40.5 | 19.1 | 3.5 | 49.2  | 14.3 | 38.3 | 58.5  | 4.5  | 10.7 | 24.8 |
| <b>DN-2<sub>2</sub></b> | 6.4  | 7.3  | 38.9 | 24.5 | 81.6  | 32.6 | 28.2 | 0.8  | 28  | 6.1  | 13.1 | 9.8  | 66.6  | 35.9 | 23.1 | 13.5 | 2.5 | 43.3  | 7.9  | 25.3 | 59.2  | 2.4  | 7.0  | 18.1 |
| <b>IŠ</b>               | 5.5  | 7.6  | 38.7 | 18.7 | 111.8 | 22.1 | 34.1 | 1.7  | 53  | 4.8  | 11.0 | 14.4 | 80.6  | 24.9 | 23.3 | 12.9 | 3.2 | 20.2  | 6.1  | 28.4 | 68.2  | 2.2  | 5.0  | 14.1 |
| <b>K-4</b>              | 6.0  | 18.3 | 18.6 | 33.7 | 70.4  | 46.6 | 29.4 | 6.4  | 159 | 11.6 | 14.5 | 31.5 | 75.0  | 36.6 | 36.5 | 14.9 | 3.3 | 43.7  | 17.2 | 29.9 | 58.2  | 6.0  | 10.2 | 30.3 |
| <b>52</b>               | 5.4  | 6.9  | 40.8 | 23.6 | 104.0 | 25.1 | 28.3 | 1.4  | 213 | 8.3  | 17.2 | 36.8 | 95.9  | 41.7 | 55.0 | 10.1 | 2.3 | 35.9  | 18.9 | 20.2 | 85.3  | 2.5  | 9.1  | 15.8 |
| <b>K-2</b>              | 6.6  | 13.1 | 39.6 | 37.8 | 97.3  | 45.7 | 38.3 | 6.2  | 203 | 9.0  | 20.0 | 46.6 | 133.7 | 36.6 | 52.3 | 14.5 | 2.7 | 56.7  | 48.9 | 49.6 | 81.0  | 5.1  | 12.4 | 34.6 |
| <b>38</b>               | 7.9  | 15.6 | 34.5 | 37.6 | 78.0  | 47.5 | 31.4 | 28.5 | 189 | 13.3 | 16.7 | 41.0 | 88.4  | 47.0 | 41.4 | 14.5 | 3.2 | 43.9  | 19.8 | 52.7 | 71.9  | 8.4  | 10.3 | 33.4 |
| <b>ČD</b>               | 4.9  | 7.8  | 41.7 | 19.2 | 111.3 | 19.7 | 26.0 | 0.8  | 61  | 5.1  | 12.9 | 16.3 | 80.3  | 22.7 | 26.1 | 10.9 | 3.2 | 28.8  | 7.7  | 26.8 | 79.7  | 2.3  | 4.8  | 10.1 |
| <b>44</b>               | 6.3  | 5.9  | 30.2 | 23.1 | 73.2  | 32.5 | 27.2 | 2.2  | 143 | 8.7  | 14.0 | 41.4 | 77.2  | 31.4 | 48.5 | 14.2 | 4.3 | 33.0  | 21.7 | 23.7 | 76.1  | 2.2  | 5.9  | 33.3 |
| <b>51</b>               | 4.7  | 3.0  | 40.4 | 17.4 | 92.2  | 17.6 | 21.5 | 0.1  | 133 | 3.8  | 20.7 | 31.4 | 104.9 | 27.1 | 35.5 | 11.0 | 3.2 | 20.7  | 9.5  | 27.5 | 77.3  | 1.6  | 6.2  | 14.3 |
| <b>45</b>               | 13.9 | 8.6  | 28.9 | 32.9 | 108.8 | 41.8 | 32.5 | 49.8 | 47  | 11.8 | 27.5 | 44.4 | 97.4  | 34.5 | 44.1 | 15.5 | 4.8 | 41.1  | 22.5 | 33.9 | 79.2  | 13.1 | 15.4 | 39.0 |
| <b>K-5</b>              | 5.1  | 6.1  | 54.9 | 29.4 | 87.6  | 34.0 | 29.4 | 1.1  | 278 | 7.6  | 15.5 | 44.3 | 87.0  | 36.3 | 53.5 | 10.6 | 2.3 | 48.3  | 45.7 | 17.9 | 75.5  | 3.0  | 12.3 | 24.1 |
| <b>K-9</b>              | 10.1 | 13.9 | 57.3 | 47.4 | 114.4 | 67.7 | 46.5 | 10.4 | 214 | 18.5 | 32.5 | 57.2 | 112.5 | 62.4 | 68.2 | 21.5 | 4.0 | 71.8  | 42.4 | 50.1 | 103.7 | 9.1  | 15.6 | 57.0 |
| <b>28</b>               | 9.9  | 15.2 | 46.9 | 44.1 | 75.2  | 55.2 | 39.0 | 30.2 | 240 | 13.9 | 24.1 | 49.3 | 110.0 | 51.4 | 49.4 | 16.7 | 4.8 | 52.6  | 40.5 | 41.7 | 73.3  | 9.5  | 11.2 | 51.1 |
| <b>41</b>               | 11.2 | 17.8 | 51.9 | 52.9 | 91.3  | 51.7 | 37.0 | 24.7 | 148 | 30.5 | 22.9 | 41.8 | 103.5 | 62.3 | 48.0 | 18.4 | 3.5 | 55.2  | 29.1 | 31.1 | 90.1  | 5.9  | 11.1 | 46.3 |
| <b>49</b>               | 4.9  | 7.8  | 53.2 | 24.8 | 95.6  | 28.6 | 30.1 | 2.8  | 192 | 7.7  | 12.3 | 30.4 | 84.8  | 43.3 | 36.3 | 10.3 | 2.1 | 36.8  | 23.2 | 32.4 | 80.6  | 3.3  | 7.9  | 18.0 |
| <b>29</b>               | 10.5 | 6.6  | 58.9 | 40.7 | 101.8 | 50.2 | 32.9 | 11.9 | 258 | 10.4 | 26.1 | 68.2 | 219.1 | 47.8 | 71.4 | 18.1 | 3.6 | 108.2 | 55.3 | 42.1 | 109.4 | 7.6  | 9.9  | 59.2 |
| <b>36</b>               | 9.6  | 6.6  | 50.6 | 41.1 | 93.3  | 49.3 | 36.2 | 22.8 | 105 | 11.6 | 17.7 | 34.5 | 89.5  | 31.9 | 55.0 | 19.1 | 2.4 | 43.6  | 6.6  | 57.1 | 76.0  | 8.5  | 12.1 | 35.2 |

<sup>1</sup> Fine fraction (from DN-2<sup>1</sup> to 51); <sup>2</sup> Coarse fraction (from DN-2<sup>2</sup> to 36).
